# Supplementary material for: Botanical Origin and Nutritional Values of Bee Bread of Stingless Bee (Heterotrigona itama) from Malaysia
Source: Hindawi journal article supplement (doi:10.1155/2020/2845757), 2020-02-10
Supplement: f1 [file 2845757.f1.pdf]

## Botanical Origin and Nutritional Values of Bee Bread of Stingless Bee (*Heterotrigona Itama*) From Malaysia

### SUPPLEMENTARY FILE 1

Amino acid chromatogram profile for bee bread samples.

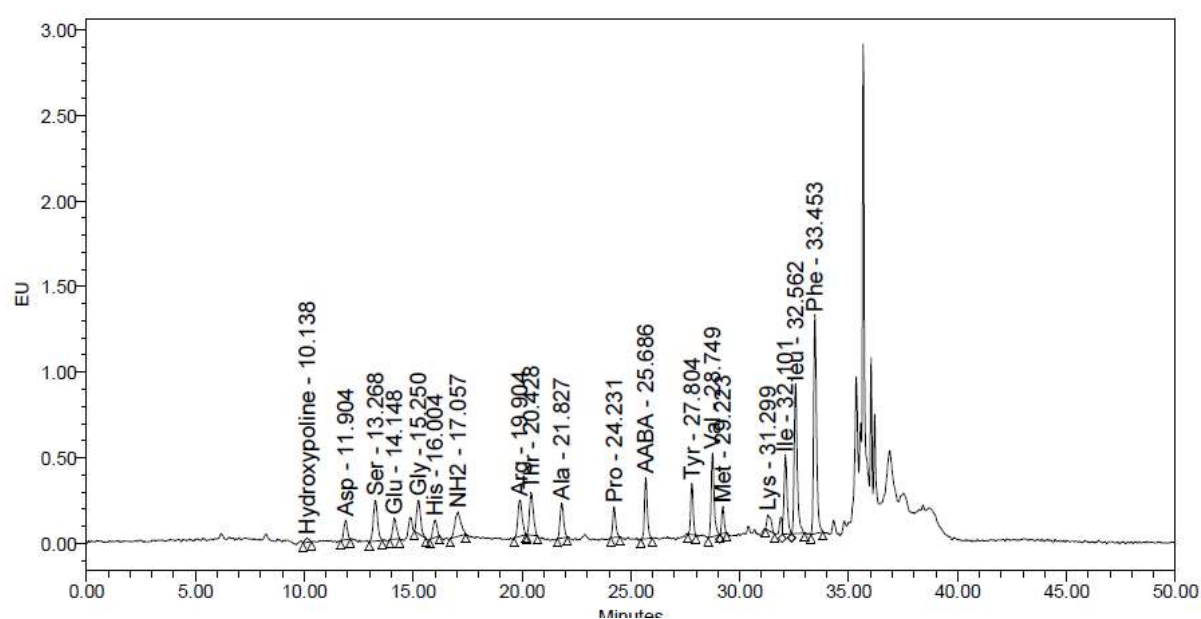

Figure S1. Amino acid chromatogram for bee bread Batang Benar sample

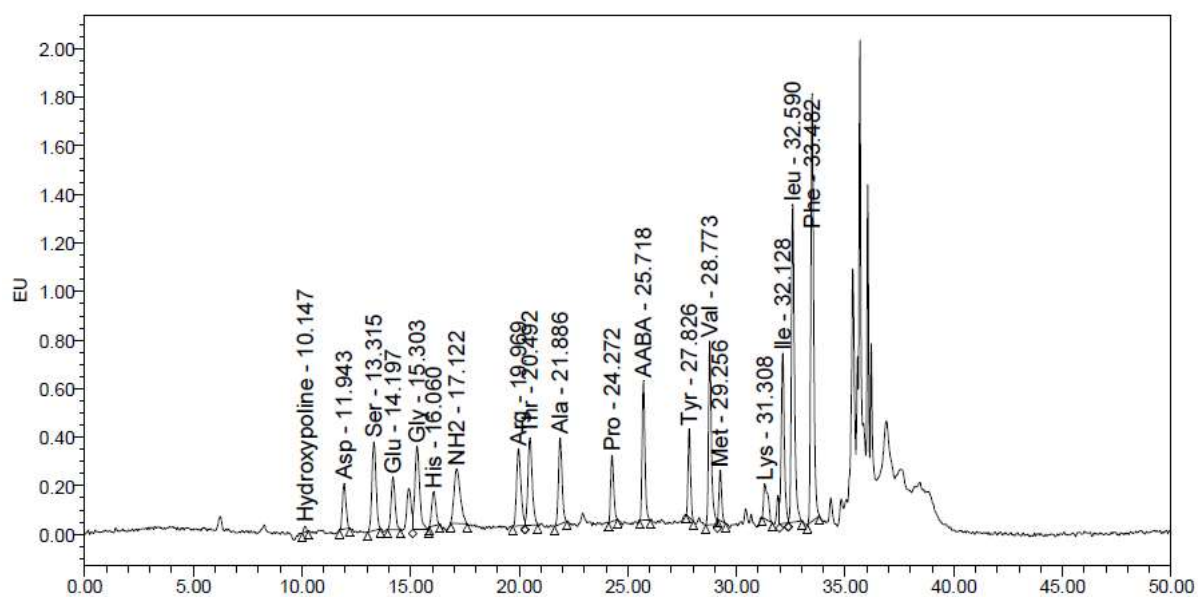

Figure S2. Amino acid chromatogram for bee bread MAEPS sample

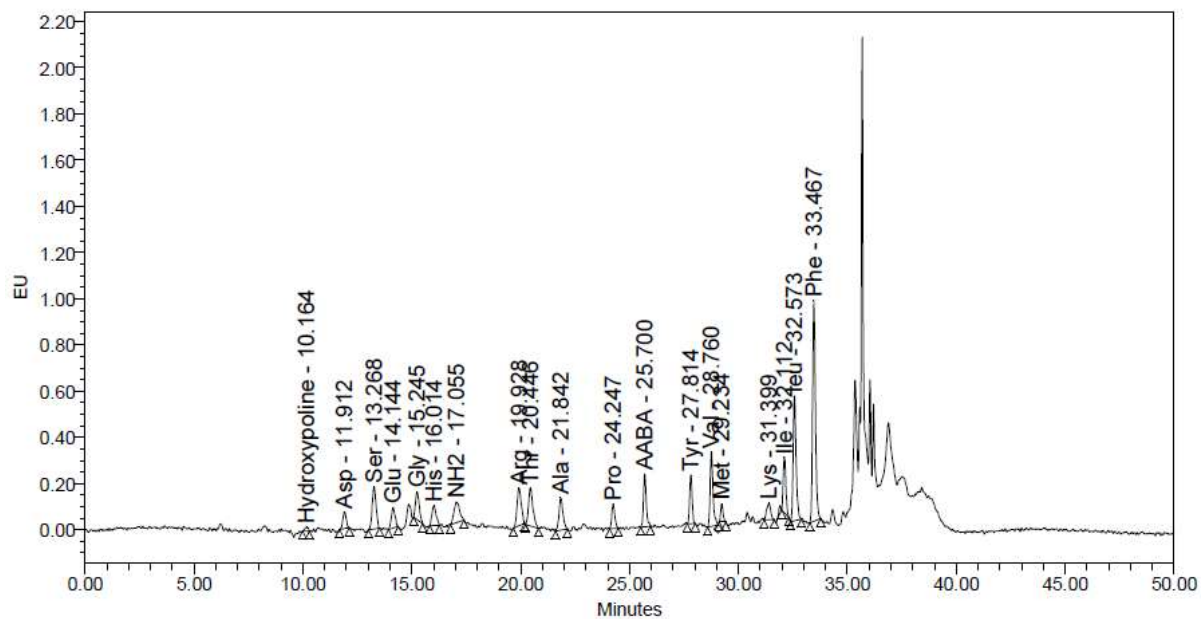

Figure S3. Amino acid chromatogram for bee bread Rinching Hilir sample.

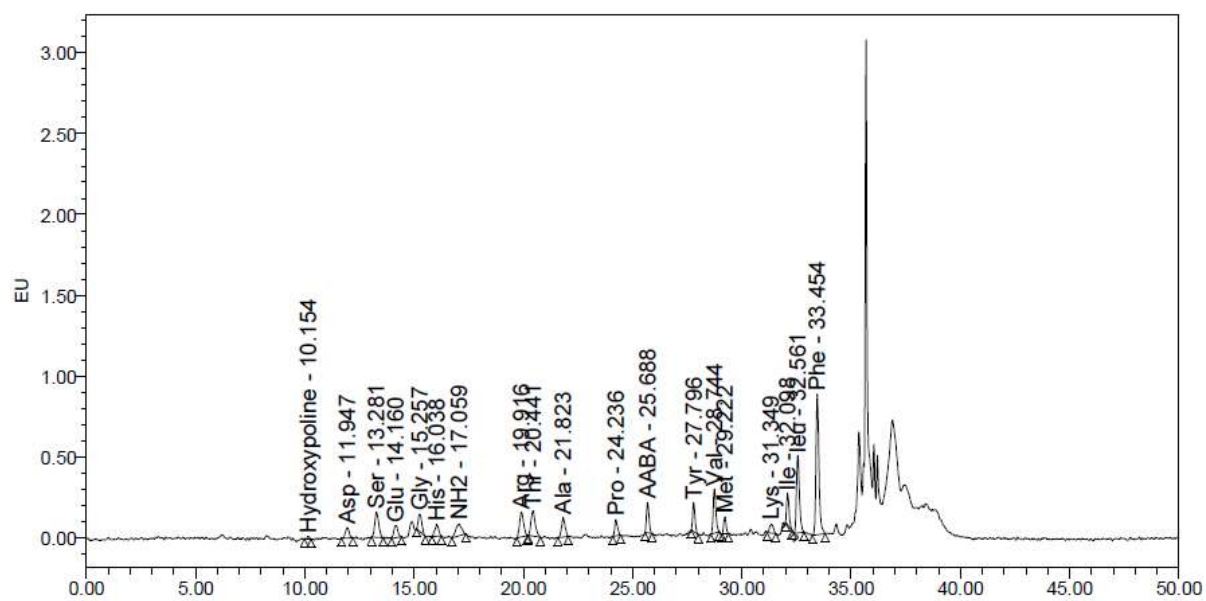

Figure S4. Amino acid chromatogram for bee bread Ladang 10 UPM.
